# Supplementary figures and images for: Promoter sequence and architecture determine expression variability and confer robustness to genetic variants
Source: eLife journal article supplement (doi:10.7554/elife.80943), 2022-11-15

**Figure 4-supplement 1****A**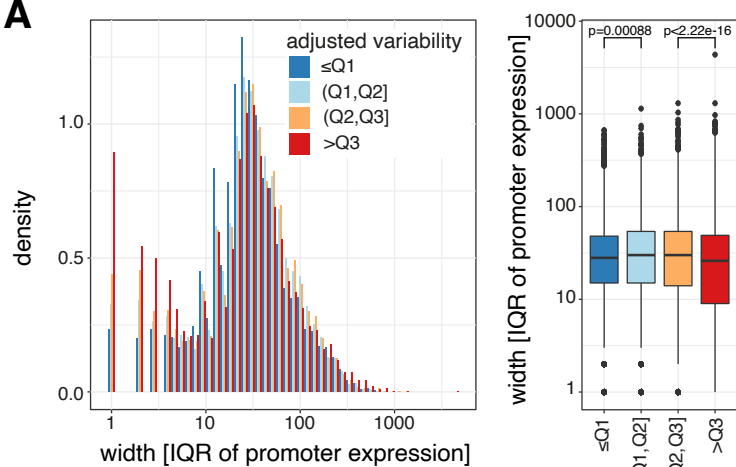**B**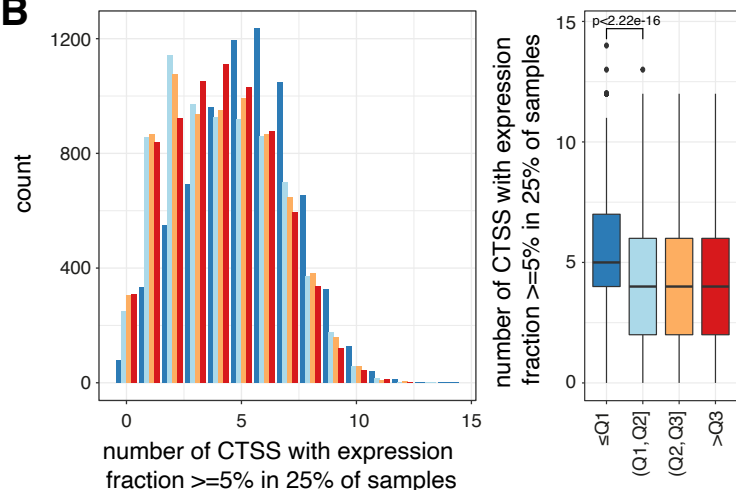**C**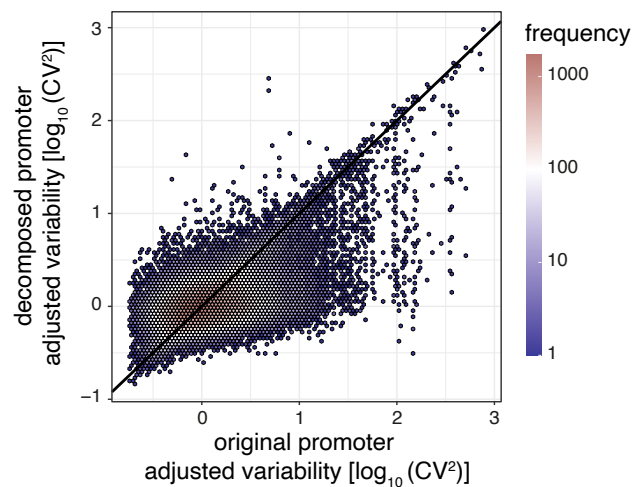**D**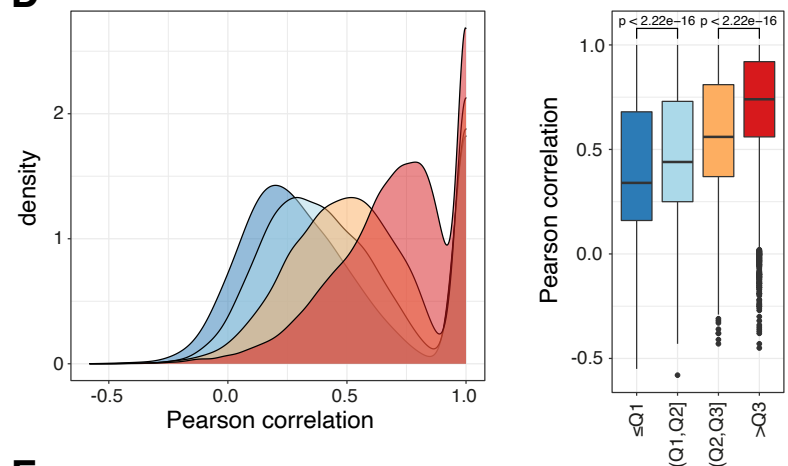**E**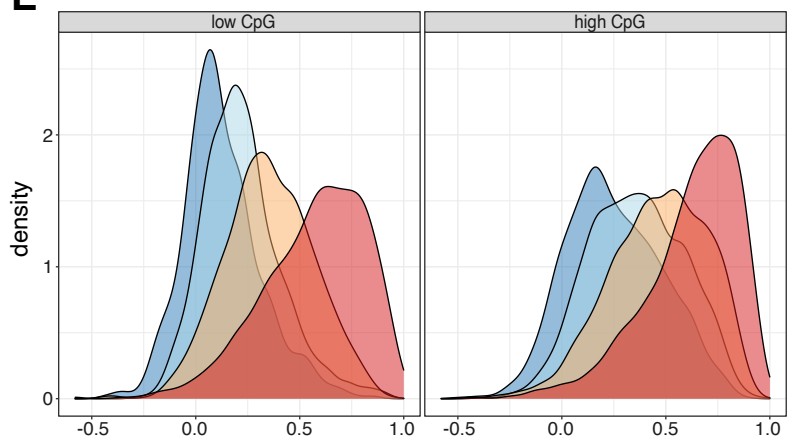**F**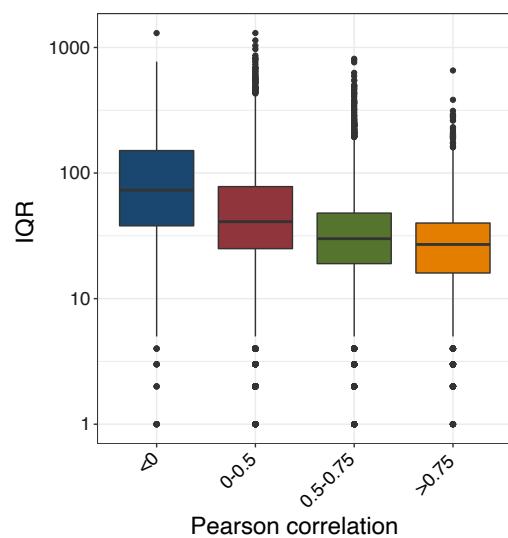

Supplement: supp [file elife-80943-supp-v1.zip]

**Figure 4—supplement 2**

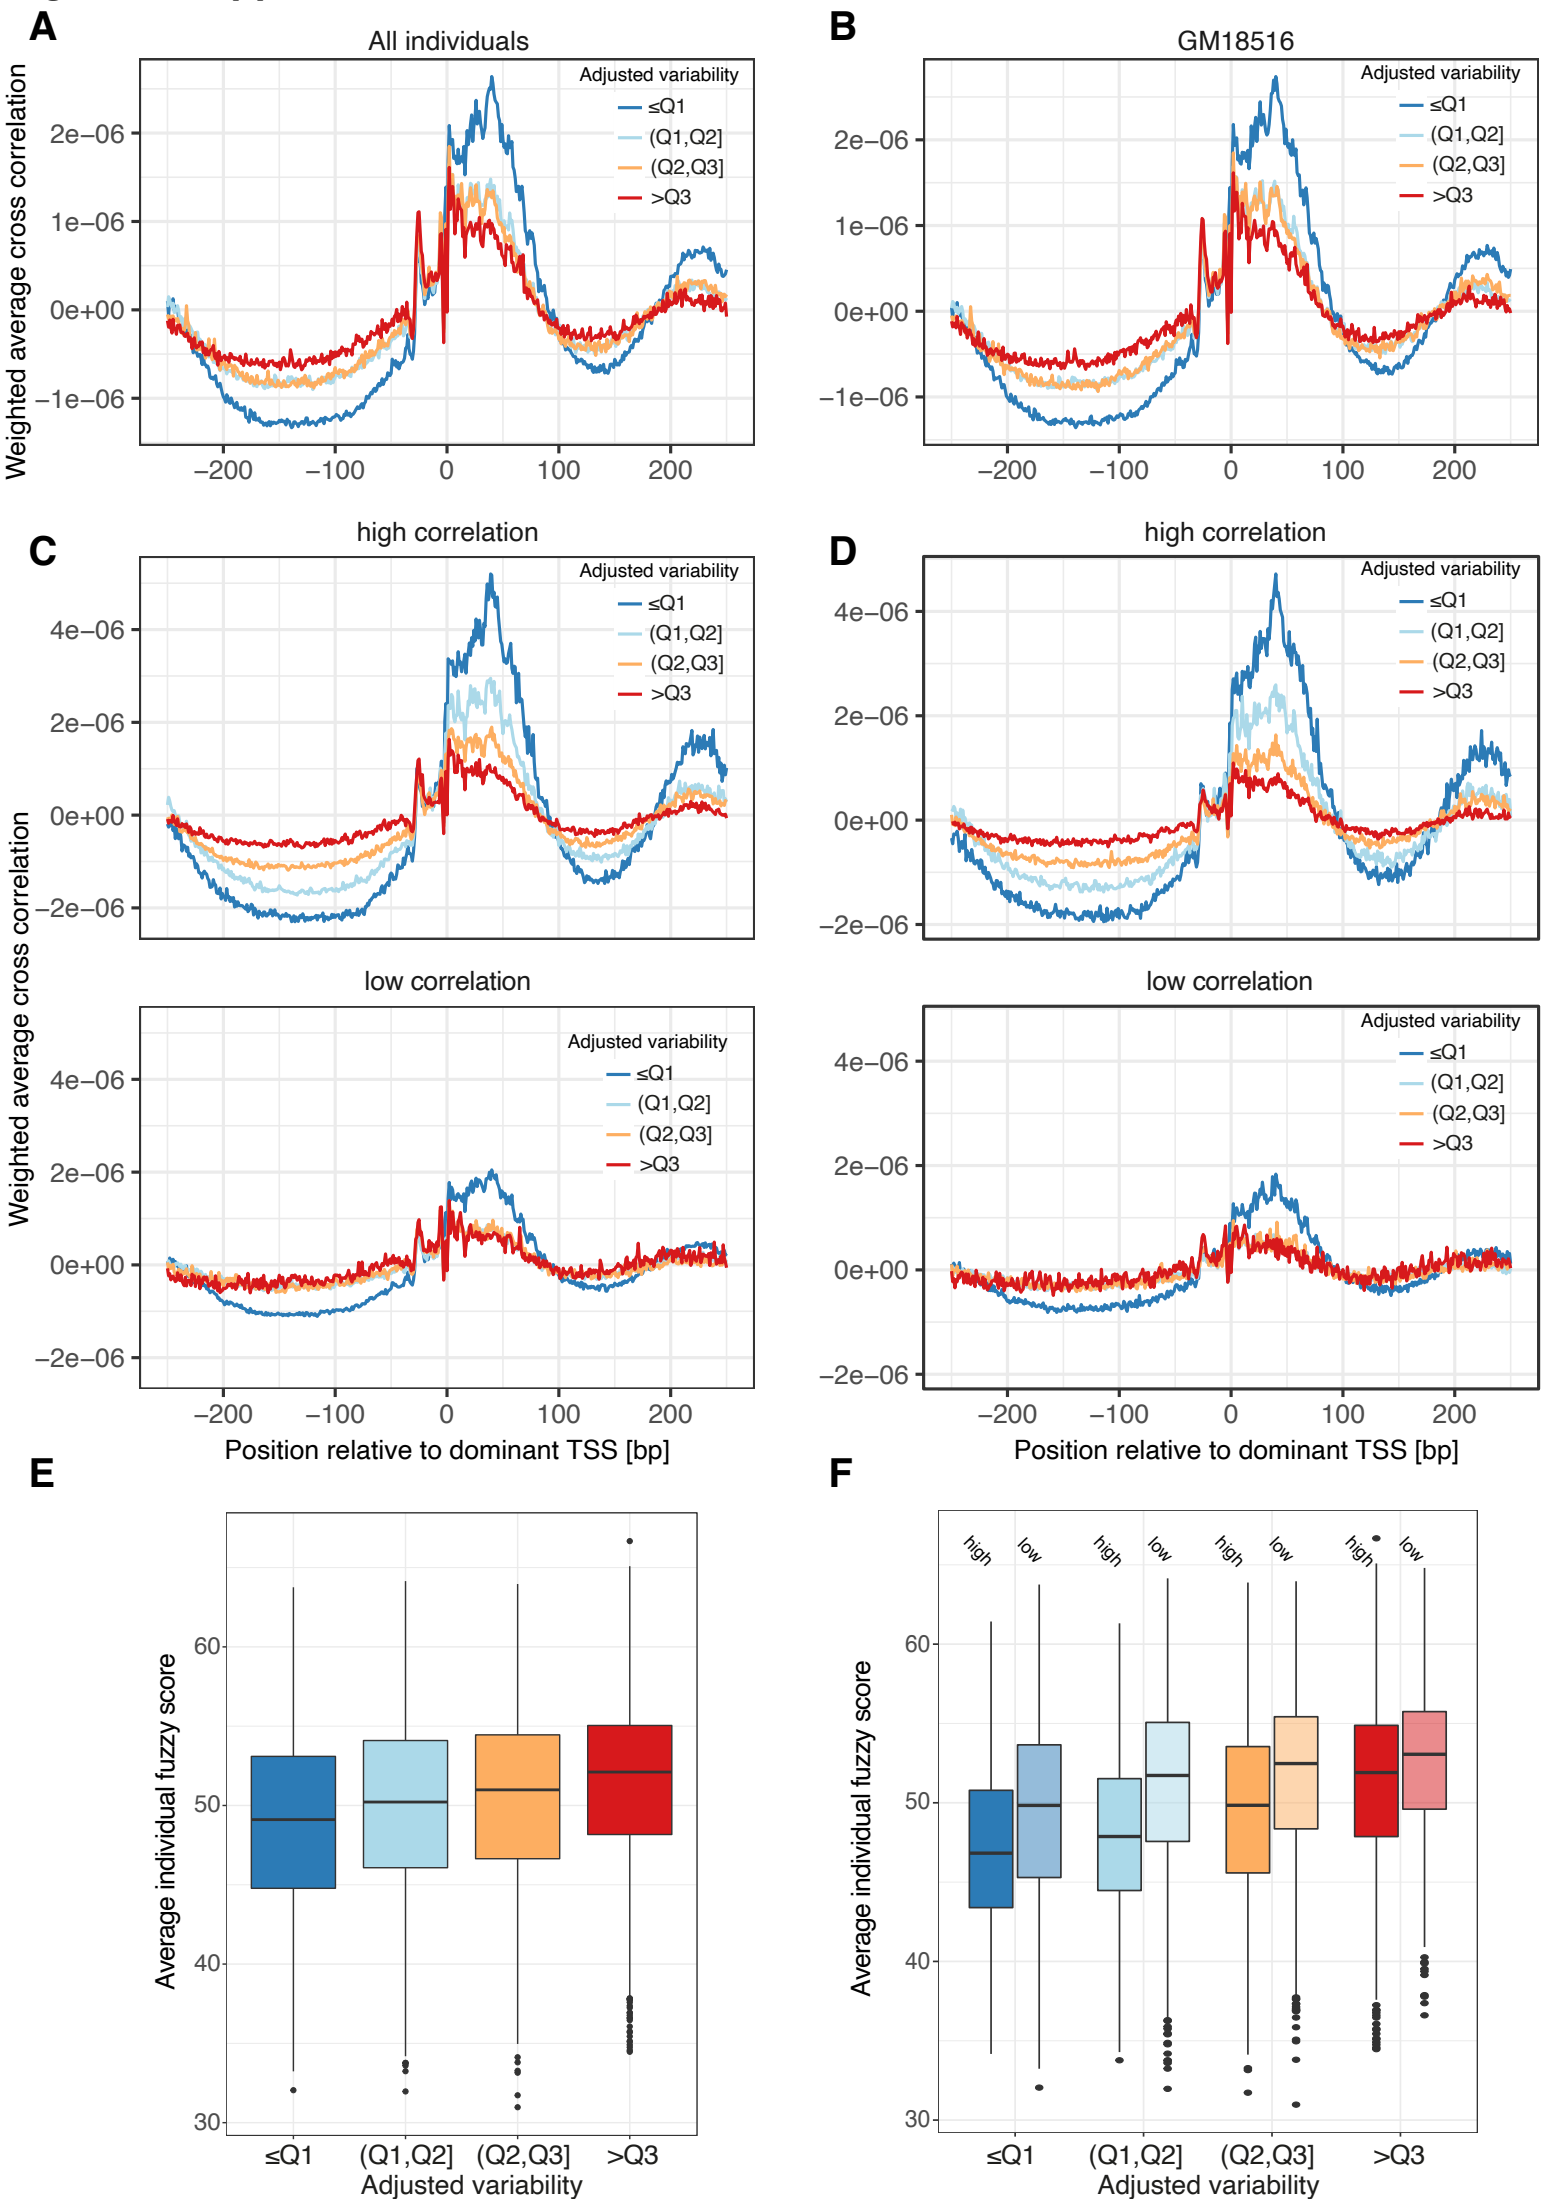

Supplement: supp [file elife-80943-supp-v1.zip]

**Figure 1–supplement 1**

**A**

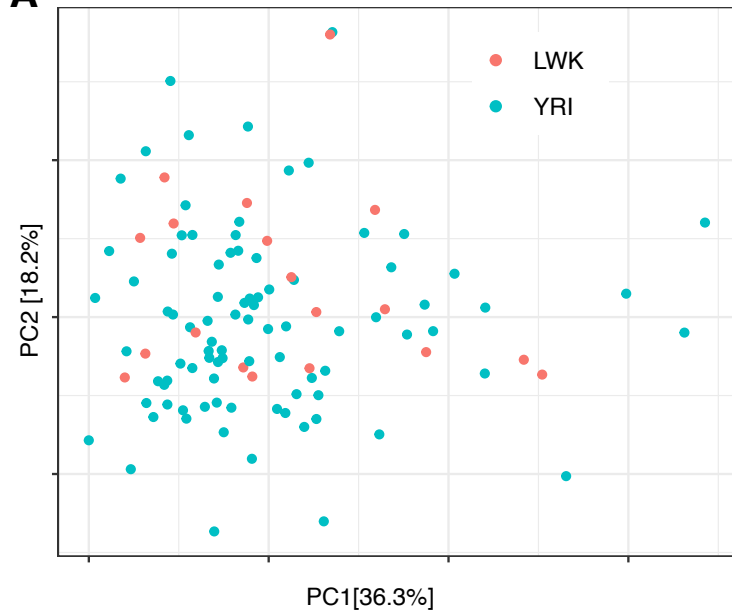

**B**

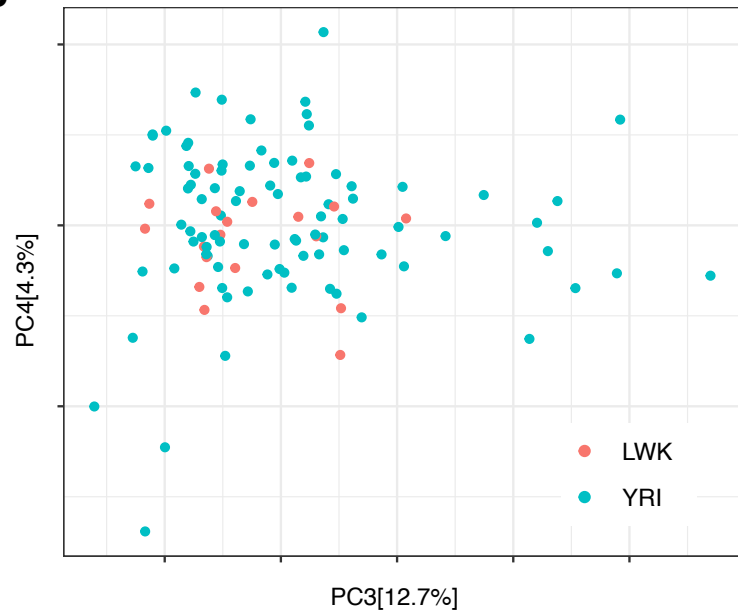

Supplement: supp [file elife-80943-supp-v1.zip]

Figure 2–supplement 4

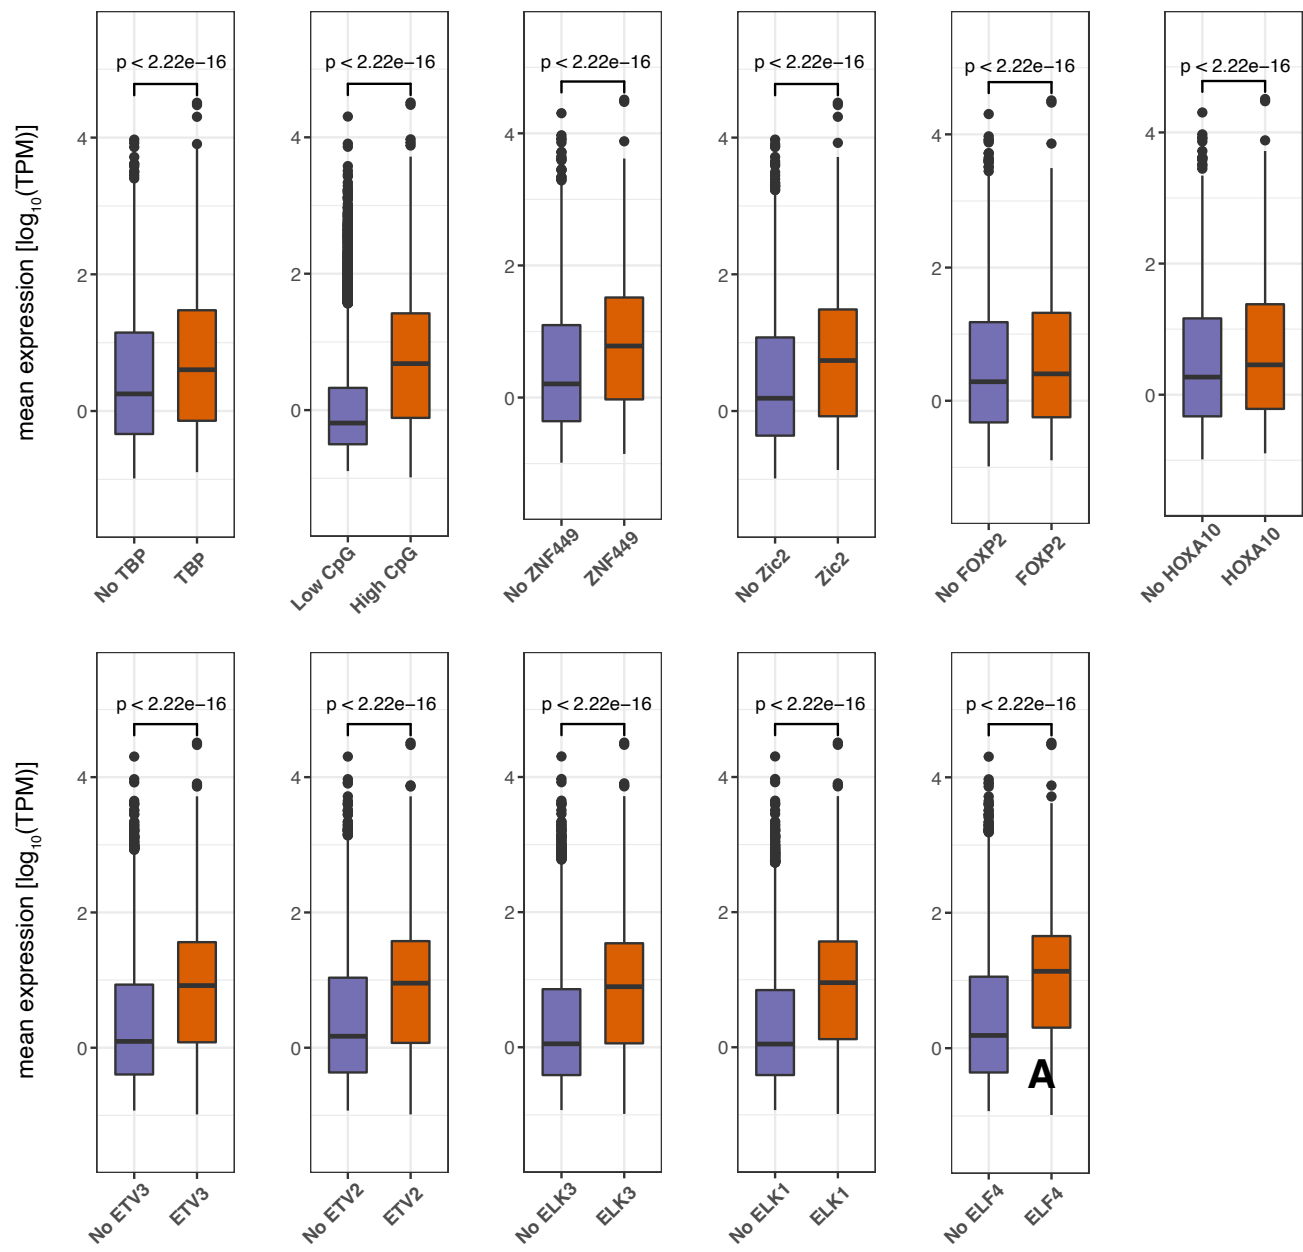

Supplement: supp [file elife-80943-supp-v1.zip]

**Figure 5—supplement 1**

**A**

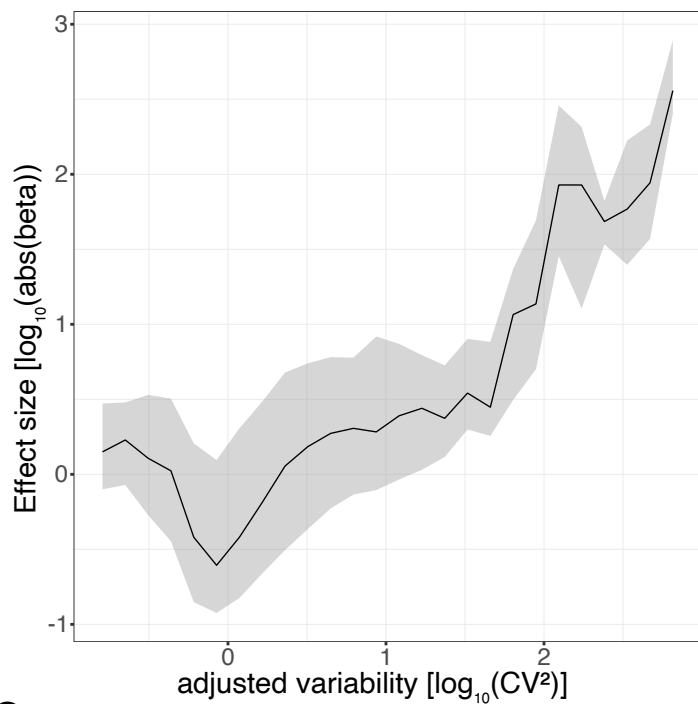

**B**

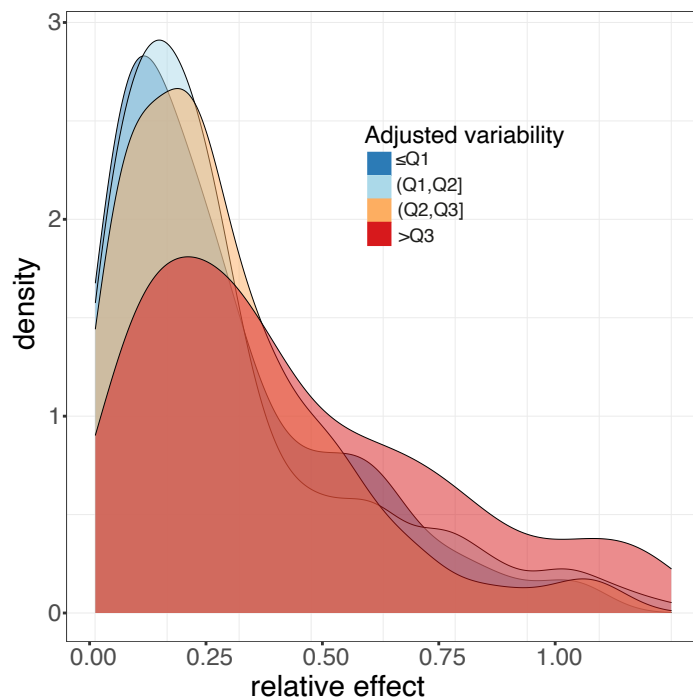

**C**

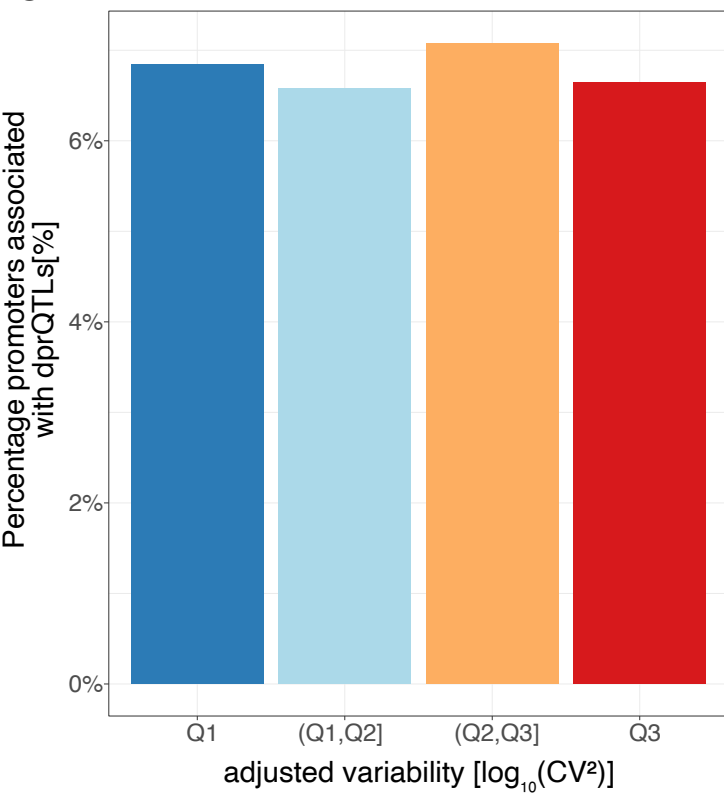

**D**

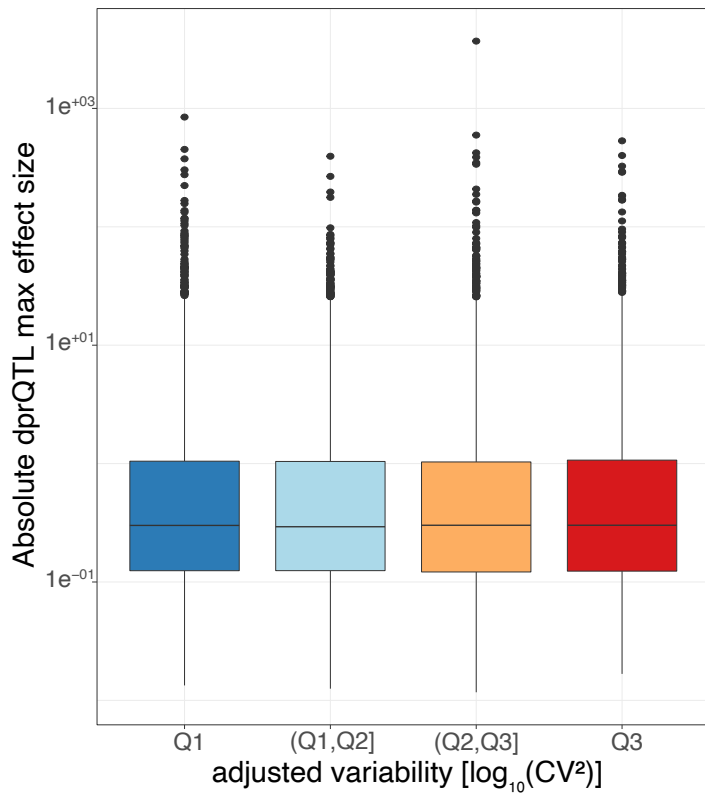

Supplement: supp [file elife-80943-supp-v1.zip]

**Figure 3—supplement 1**

**A**

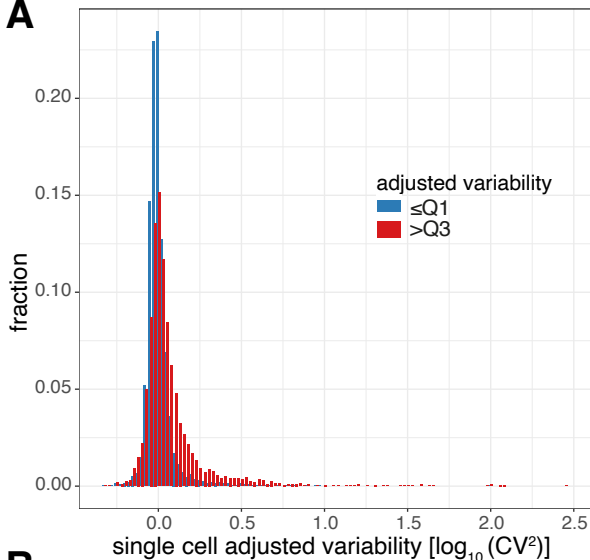

**B**

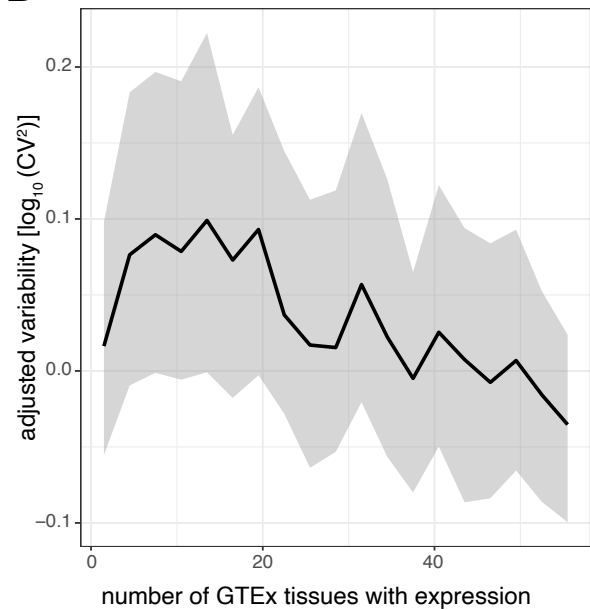

**C**

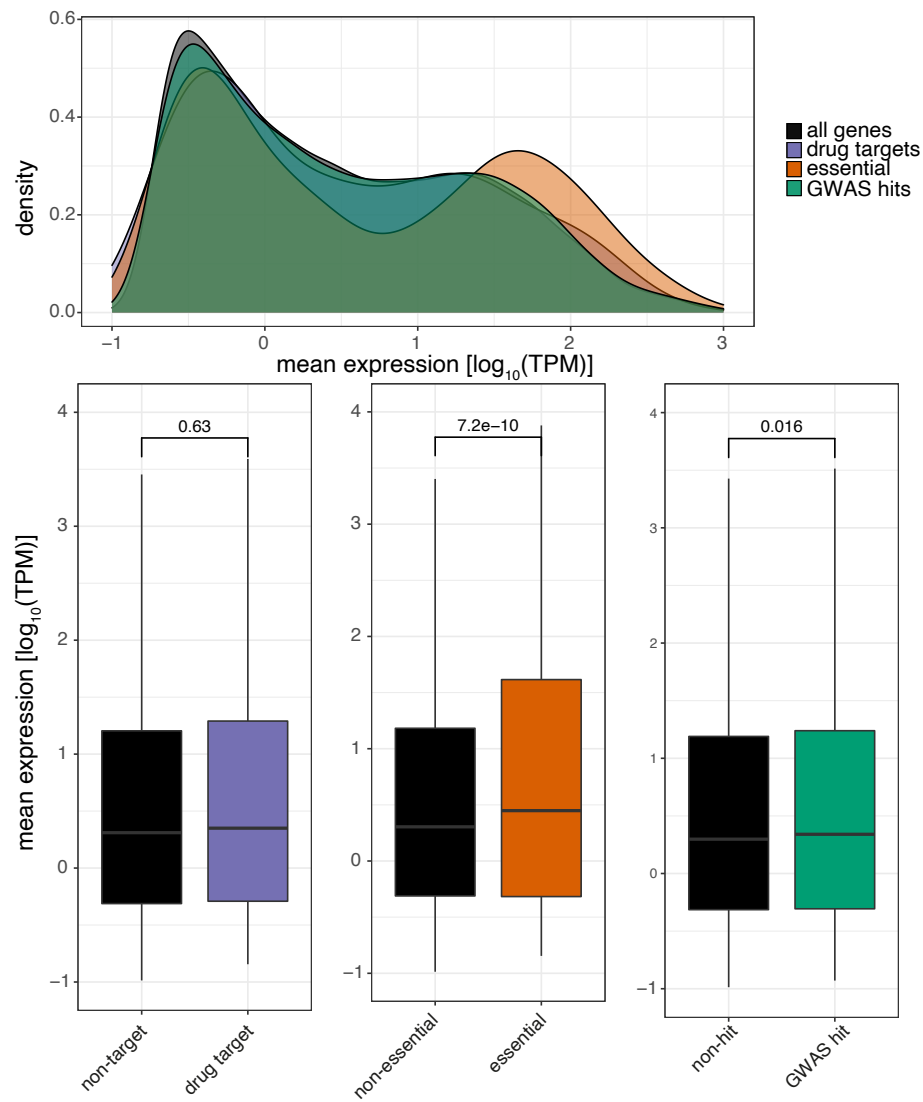

Supplement: supp [file elife-80943-supp-v1.zip]

**Figure 2—supplement 5**

**A**

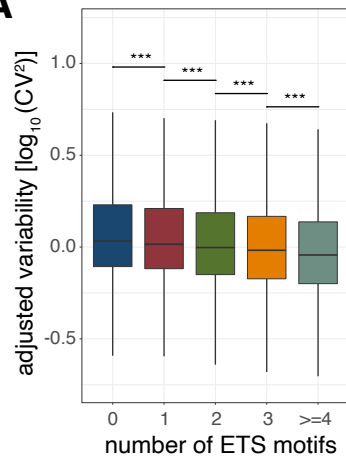

**B**

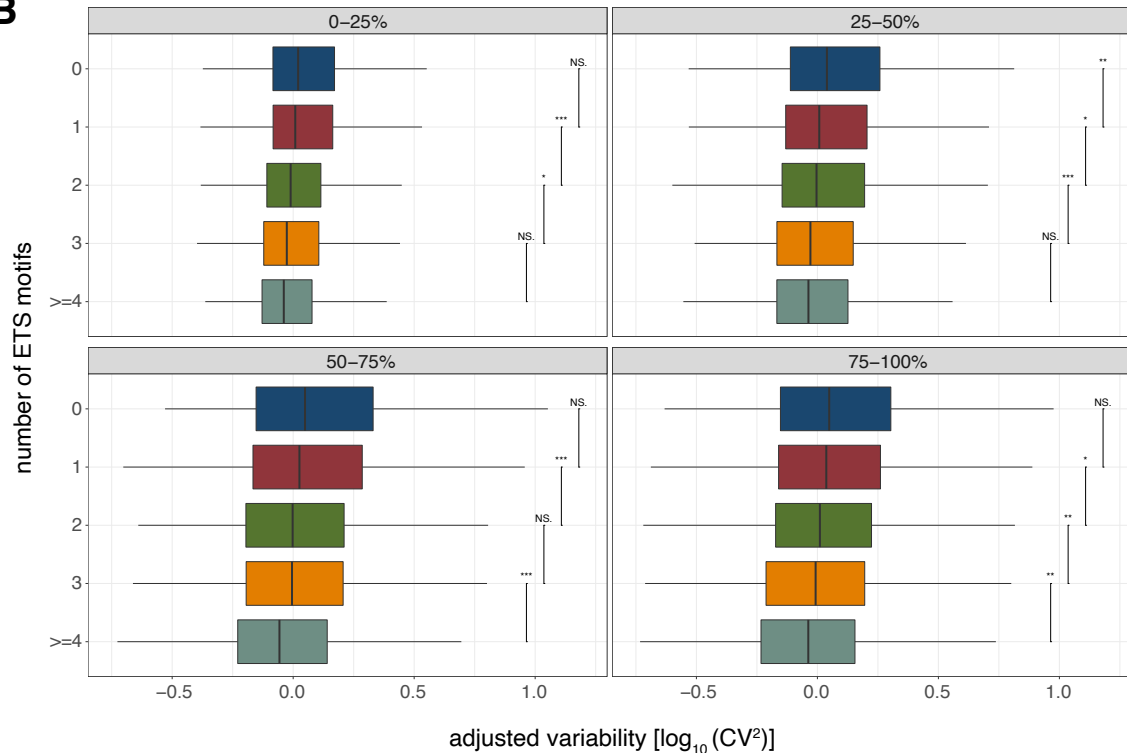

Supplement: supp [file elife-80943-supp-v1.zip]

**Figure 2—supplement 3**

**A**

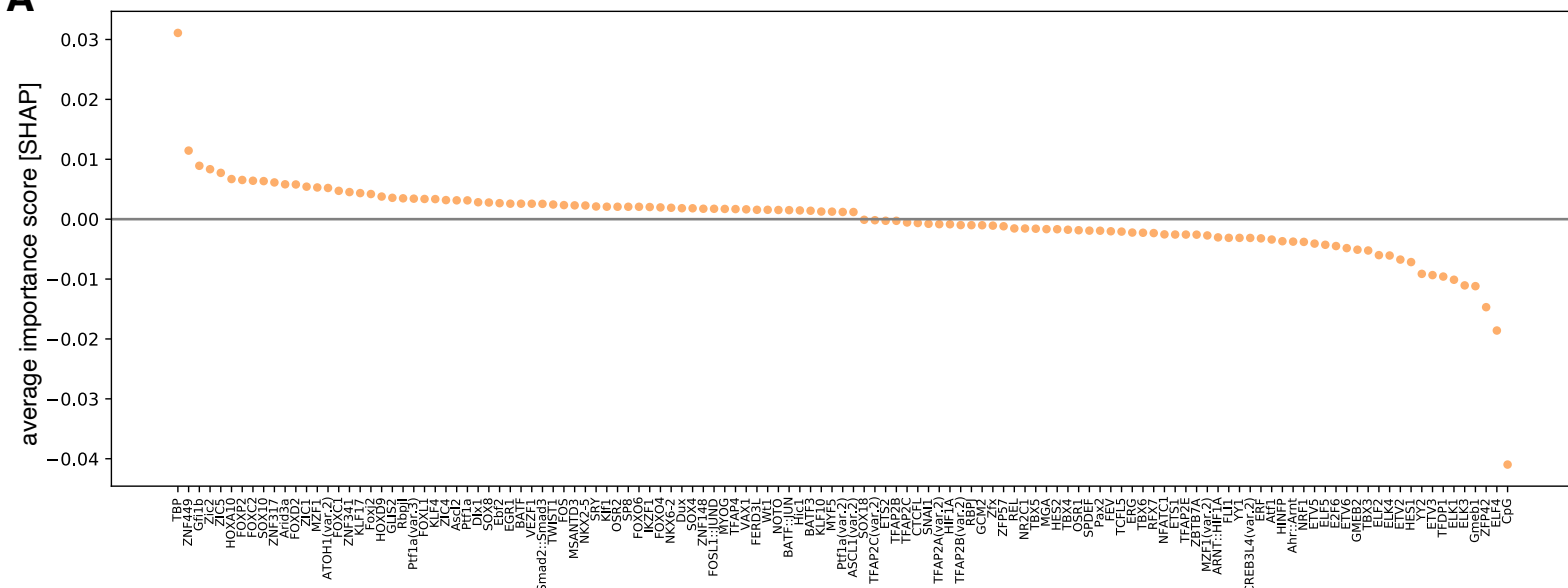

**B**

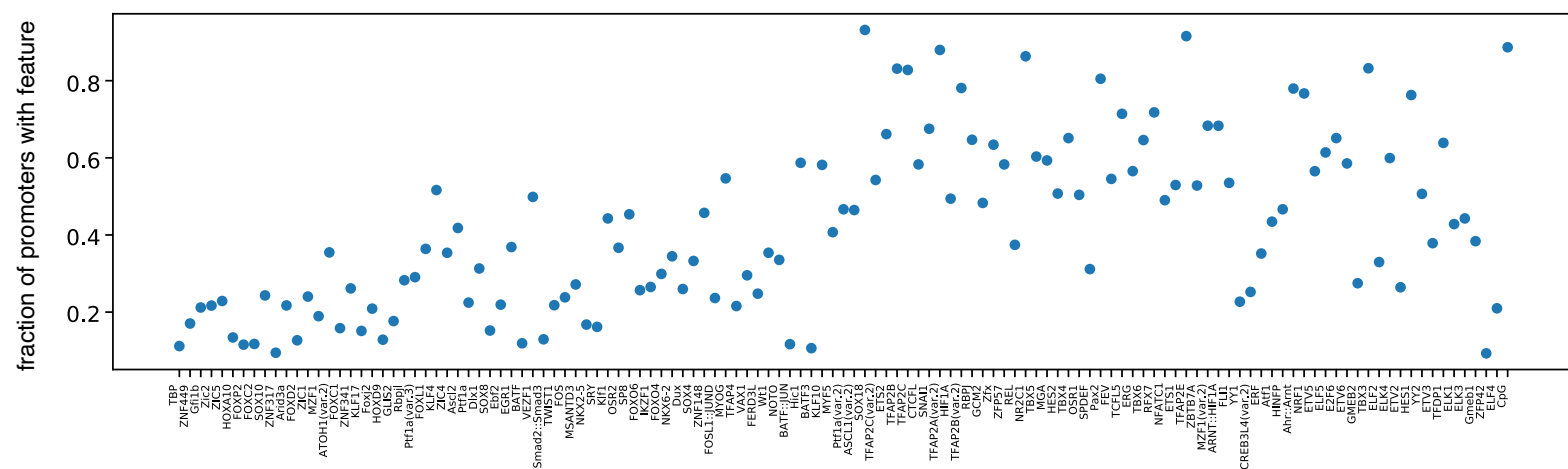

**C**

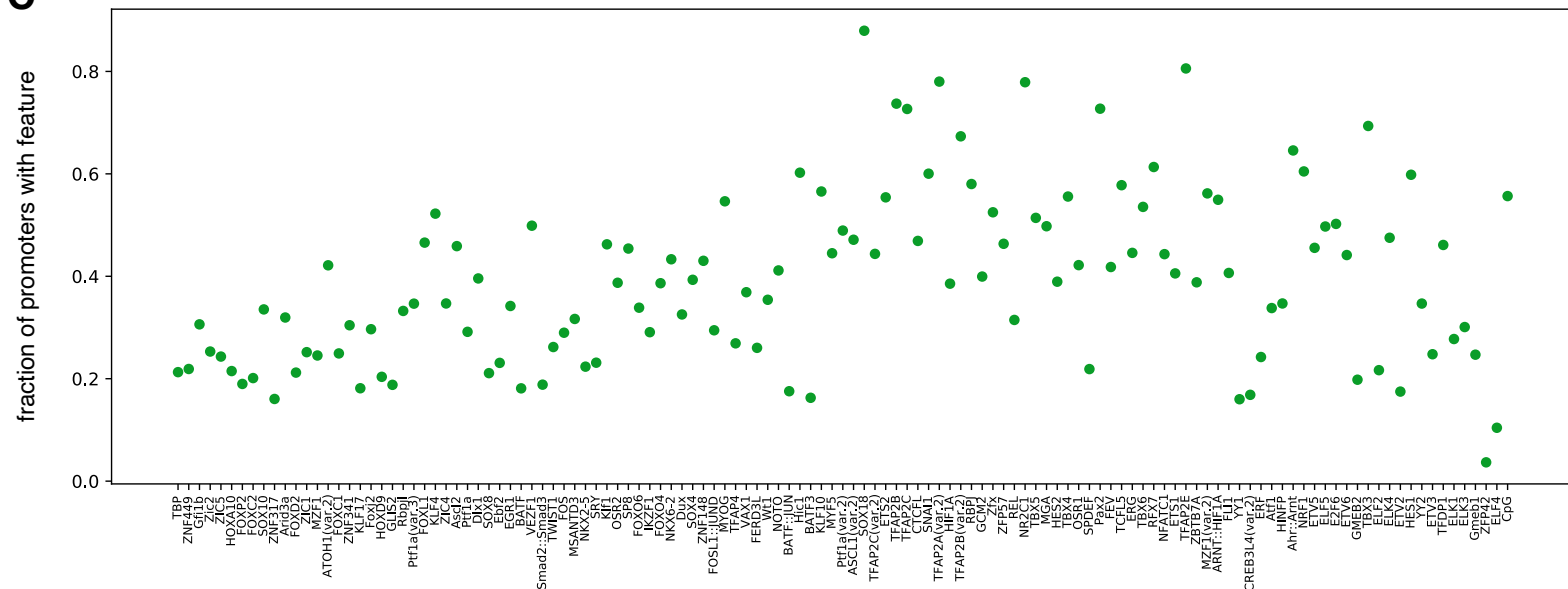

Supplement: supp [file elife-80943-supp-v1.zip]

# Figure 2-supplement 1

**A**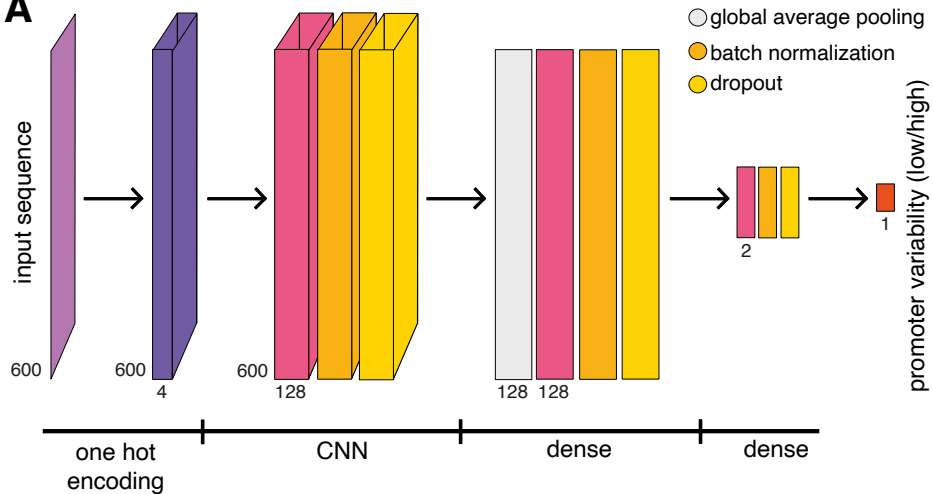**B**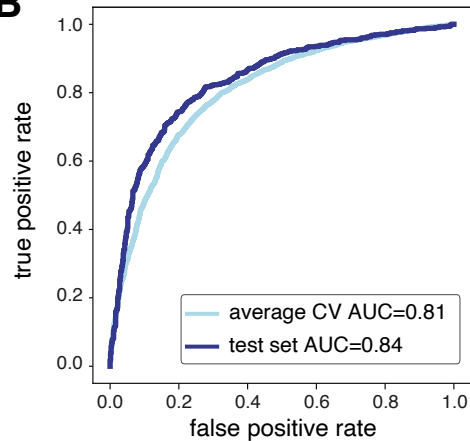

Supplement: supp [file elife-80943-supp-v1.zip]

# Figure 2-supplement 2

**A**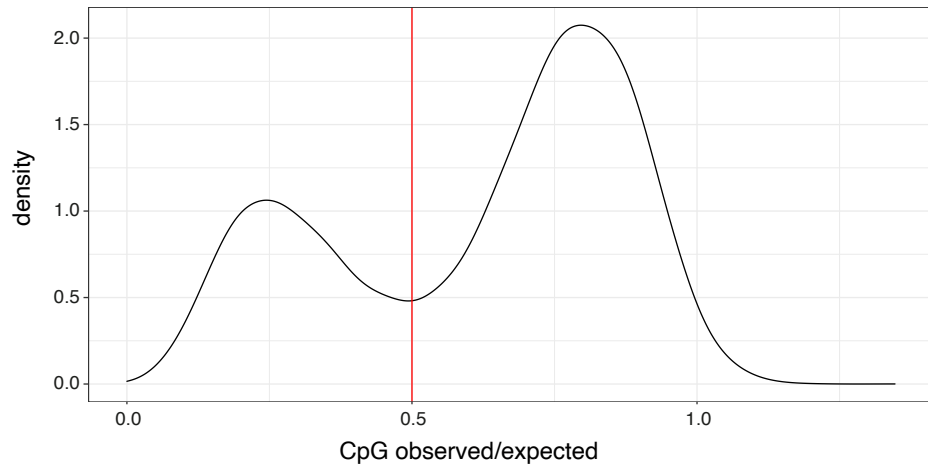**B**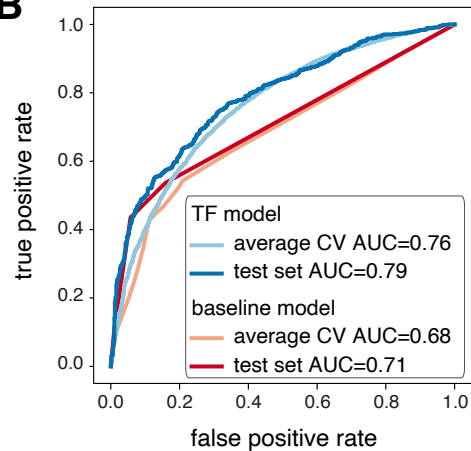

Supplement: supp [file elife-80943-supp-v1.zip]
